# Supplementary material for: Selective defects in gene expression control genome instability in yeast splicing mutants
Source: PubMed Central journal article supplement — Mol Biol Cell. 2019 Jan 15;30(2):191–200. doi: 10.1091/mbc.E18-07-0439 (PMC6589566; doi:10.1091/mbc.e18-07-0439), 2019-01-15

# Supplemental Materials

*Molecular Biology of the Cell*

Tam et al.

## SUPPLEMENTARY INFORMATION

**Figure S1.** (A) Splicing efficiency of a LacZ reporter, values are relative to WT splicing level. Schematic of reporter constructs are presented above panel; Student's t-test (B) Quantification of *RPL33B* mRNA transcript levels from intron region in WT, *yhc1-1*, *hsh155-1* and *snu114-60* by RT-qPCR normalized to *SPT15* and relative to WT. (C) Quantification of *YRA1* mRNA transcript levels from exon region in WT, *hsh155-1* and *snu114-60* (left) and *YRA1* intron region (right) by RT-qPCR normalized to *SPT15* and relative to WT. (B,C) p-values calculated from  $\Delta\Delta Ct$  levels (ANOVA). (A-C) Mean values with S.E.M. error bars are shown,  $n = 3$ . (D) FACS analysis of DNA content (x axis, arbitrary units) in yeast cells 30min, 90min, and 150min after release from  $\alpha$ -factor G1 arrest. Peaks indicate 1N and 2N cells. Left, graph depicts percent of 2N cells in each strain at 30min, 90min, and 150min post-release. (E) Western blot of Tub1 protein levels in the indicated strains. Strains were incubated at the indicated temperatures for 6.5 hours. Bottom, Ponceau stain. (F) Western blot of Tub1 protein levels in the indicated strains at 37°C. (G) s9.6 antibody staining intensities in chromosome spreads. Student's t-test was used to calculate significance. Mean values and S.E.M are shown,  $n = 3$ . (H) Frequency of direct repeat recombination on the indicated integrated genomic reporter. Reporter construct schematic is presented above panel. Student's t-test was used to calculate significance. Mean values and S.E.M are shown,  $n = 5$ . (I) Western blot of Tub1 protein levels in the indicated strains, in the presence of galactose or dextrose-containing media to induce or repress expression of *TUB1*. (J) Frequency of *MAT* locus loss in the indicated strains in dextrose. Student's t-test was used to calculate significance. Mean values and S.E.M are shown,  $n = 5$ .

**Table S1.** SGA scores and hit list from *hsh155-1* screen.

**Table S2.** Gene Ontology terms enriched among *hsh155-1* negative interacting partners.

**Table S3.** Yeast strains, plasmids and primers.

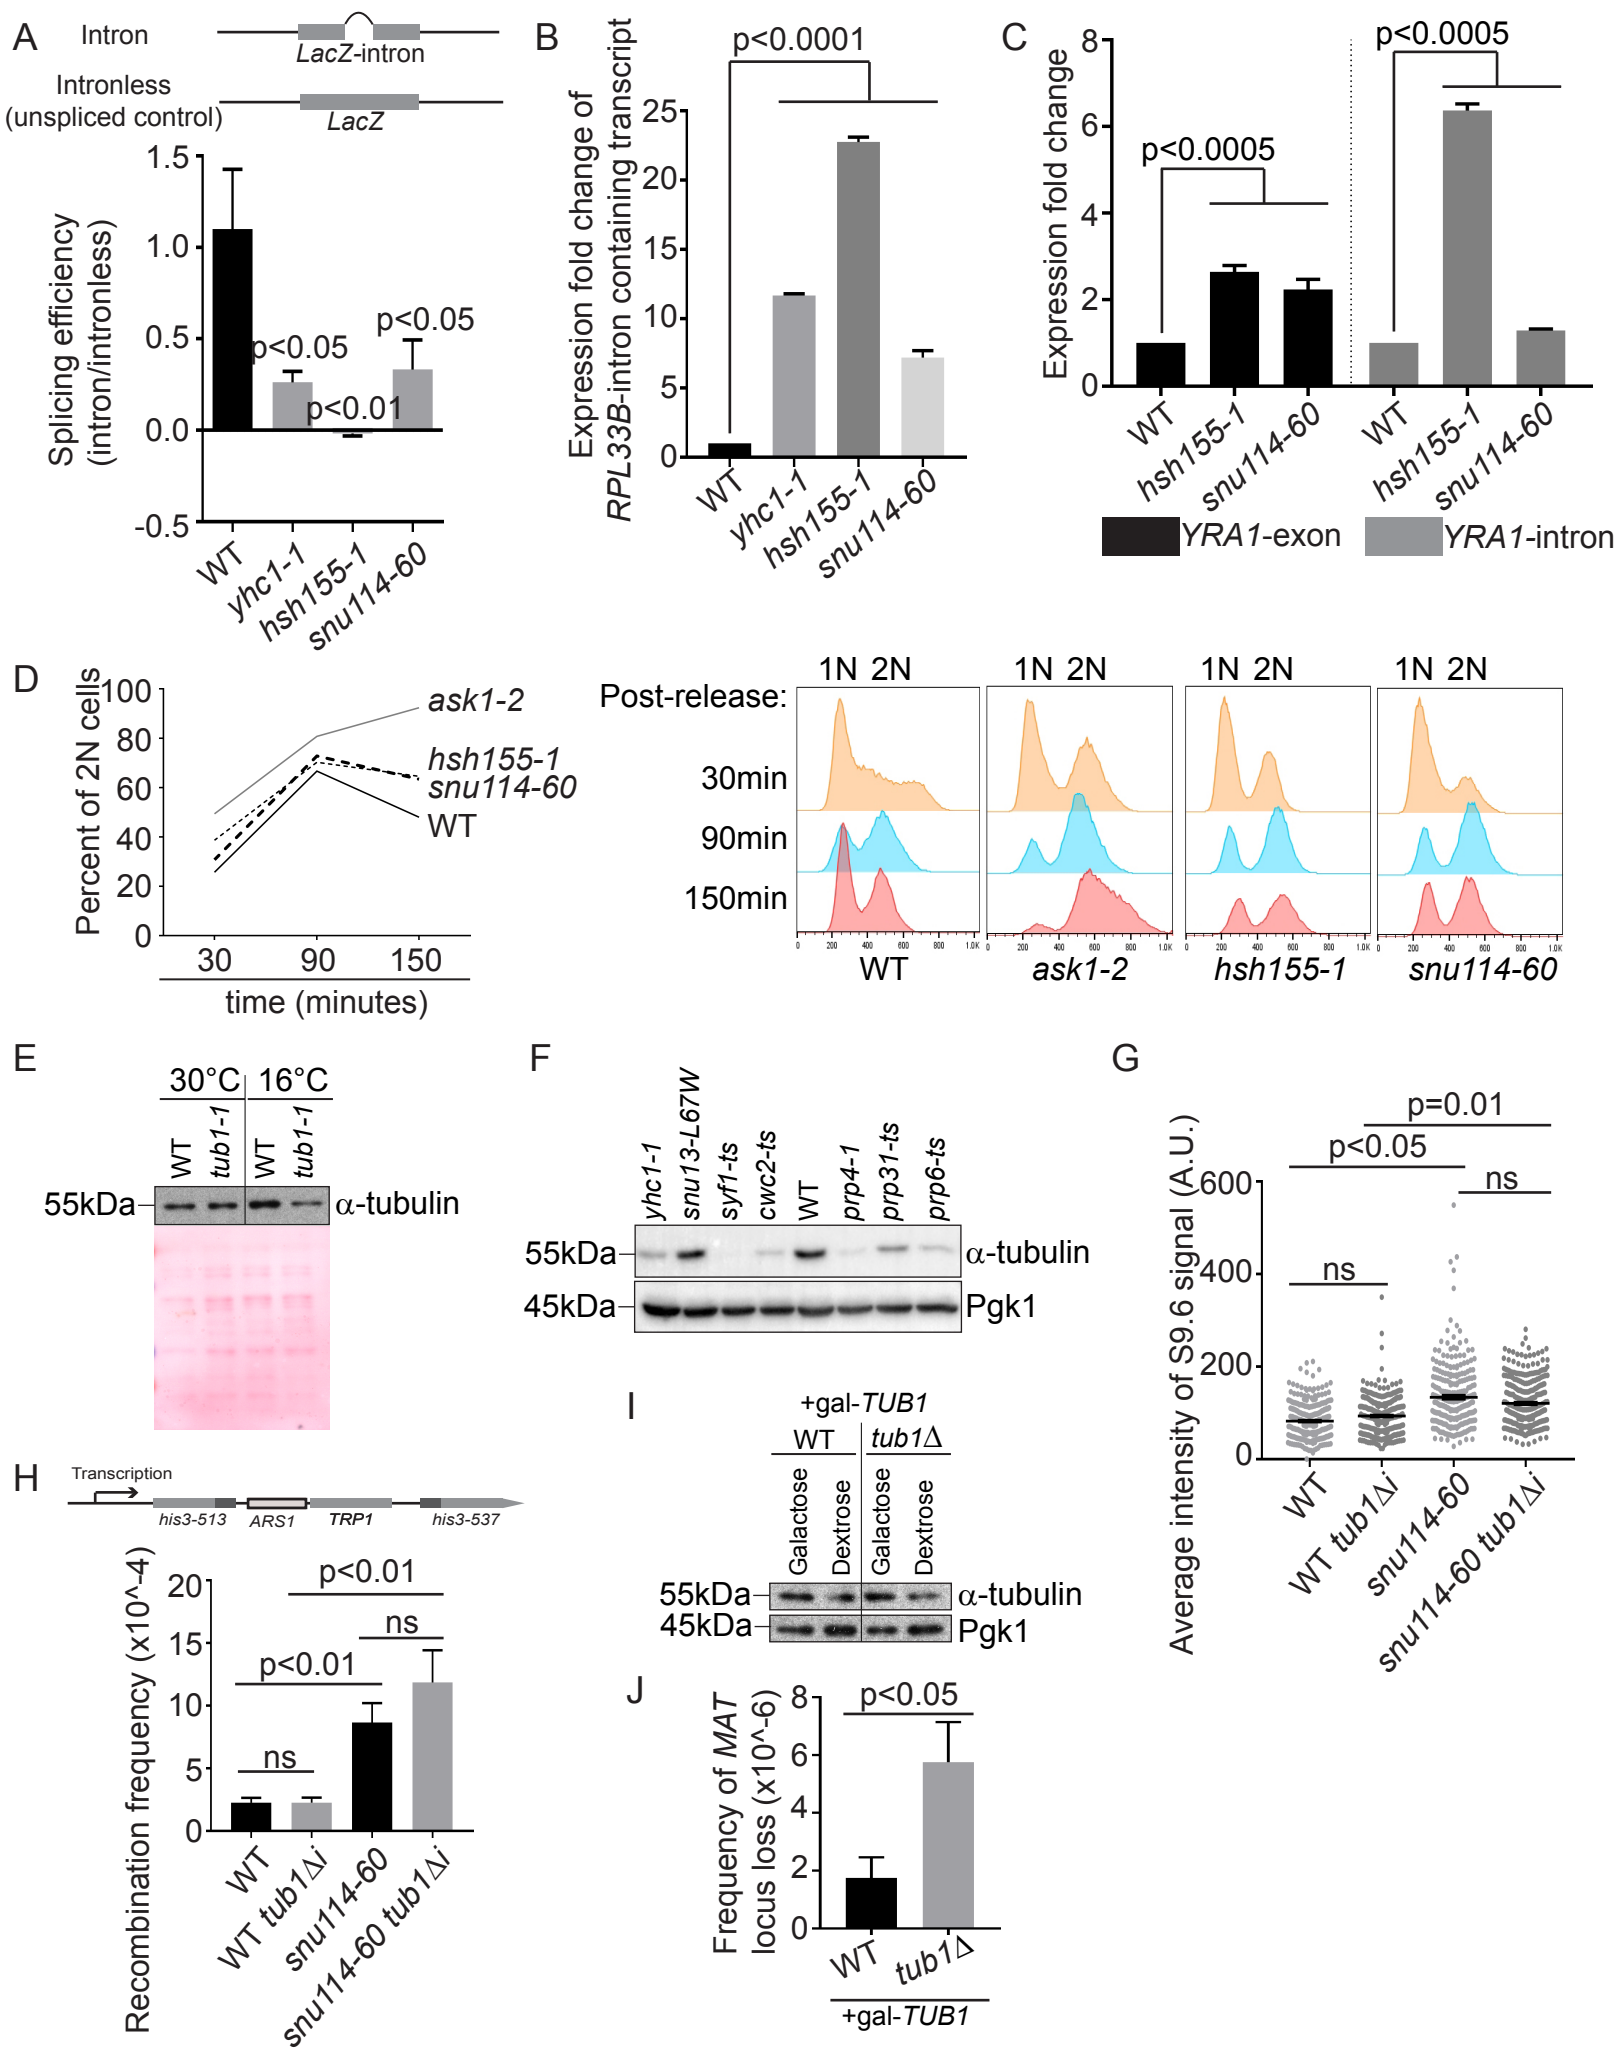

Supplement: mbc-30-191-s001.pdf [file mbc-30-191-s001.pdf]
